# Supplementary material for: Do molecular dynamics force fields accurately model Ramachandran distributions of amino acid residues in water?
Source: Royal Society of Chemistry journal article supplement (doi:10.1039/d1cp05069a), 2022-01-01
Supplement: d1cp05069a1.zip [file d1cp05069a1.zip]

Received Date

Accepted Date

DOI: 00.0000/xxxxxxxxxxx
